# Supplementary material for: Piceatannol Alleviates Deoxynivalenol-Induced Damage in Intestinal Epithelial Cells via Inhibition of the NF-κB Pathway
Source: MDPI journal article supplement (doi:10.3390/molecules29040855), 2024-02-14
Supplement: s1 [file s1]

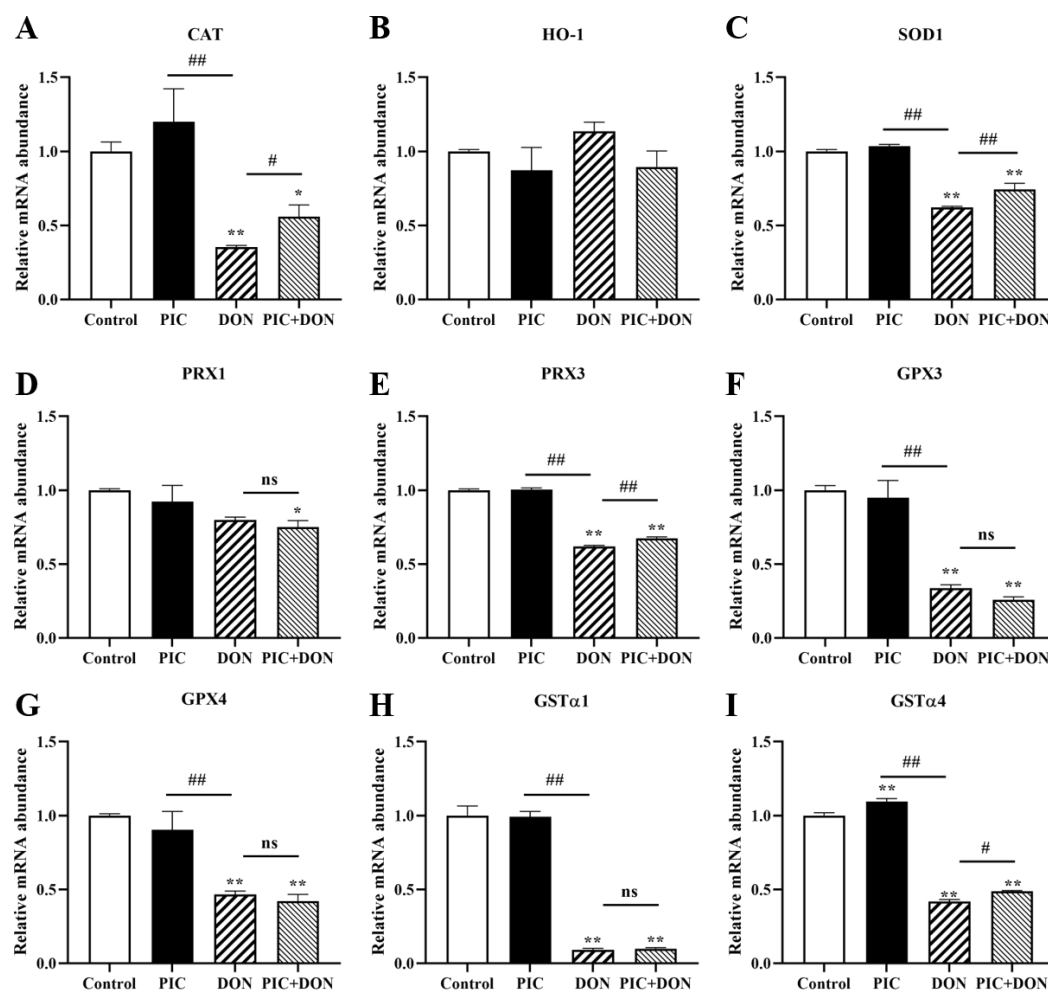

**Figure S1.** The effect of PIC on the expression of antioxidant genes in DON-treated IPEC-J2 cells. Cells were pretreated with PIC (100  $\mu$ M) and then exposed to DON (0.5  $\mu$ g/mL) for 24 h. (A-I) The mRNA expression of CAT, HO-1, SOD1, PRX1, PRX3, GPX3, GPX4, GST $\alpha$ 1, GST $\alpha$ 4. The data are means  $\pm$  SEMs (n=3). Note: \*\* means  $p < 0.01$ , and \* means  $p < 0.05$ , compared with the control group; ## means  $p < 0.01$ , # means  $p < 0.05$ , compared with the DON alone group. "ns" means none statistic significant.

**Table S1.** Primers used for quantitative real-time PCR (antioxidant genes).

| <b>Genes</b>                   | <b>Forward Primer (5'-3')</b> | <b>Reverse primer (5'-3')</b> | <b>Product size (bp)</b> |
|--------------------------------|-------------------------------|-------------------------------|--------------------------|
| <i>CAT</i>                     | TCCAGCCAGTGACCAGATGA          | CCCGGTCAAAGTGAGCCATT          | 182                      |
| <i>HO-1</i>                    | TGATGGCGTCCTTGTACCAC          | GACCGGGTTCTCCTTGTGT           | 71                       |
| <i>SOD1</i>                    | AAGGCCGTGTGTGTGCTGAA          | GATCACCTTCAGCCAGTCCTTT        | 118                      |
| <i>PRX1</i>                    | GCAGTGAGGACCTTTACCCA          | TCACTTTCCTTCCCGATGCC          | 111                      |
| <i>PRX3</i>                    | GCTGTTAGAAGGTCCCGGTC          | GAGGGTCTCTTCCACGCTTC          | 118                      |
| <i>GPX3</i>                    | GTATGGAGCCCTCACCATCG          | TCAGTTCAACGTACTGGCCC          | 122                      |
| <i>GPX4</i>                    | TGGCCTCTCAATGAGGCAAG          | CCCTTGGGCTGGACTTTCAT          | 253                      |
| <i>GST<math>\alpha</math>1</i> | ACACCCAGGACCAATCTTCTG         | AGTCTCAGGTACATTCCGGG          | 199                      |
| <i>GST<math>\alpha</math>4</i> | CCCCGGATGACATCTACGTG          | GGTCCTGTAACACTCACGGG          | 250                      |
